# Supplementary material for: High resolution digital outcrop model of faults and fractures in caprock shales, Konusdalen West, central Spitsbergen
Source: Copernicus journal article supplement (doi:10.5194/essd-2022-143), 2022-08-26
Supplement: Supplementary file [file essd-2022-143-AC1-supplement.pdf]

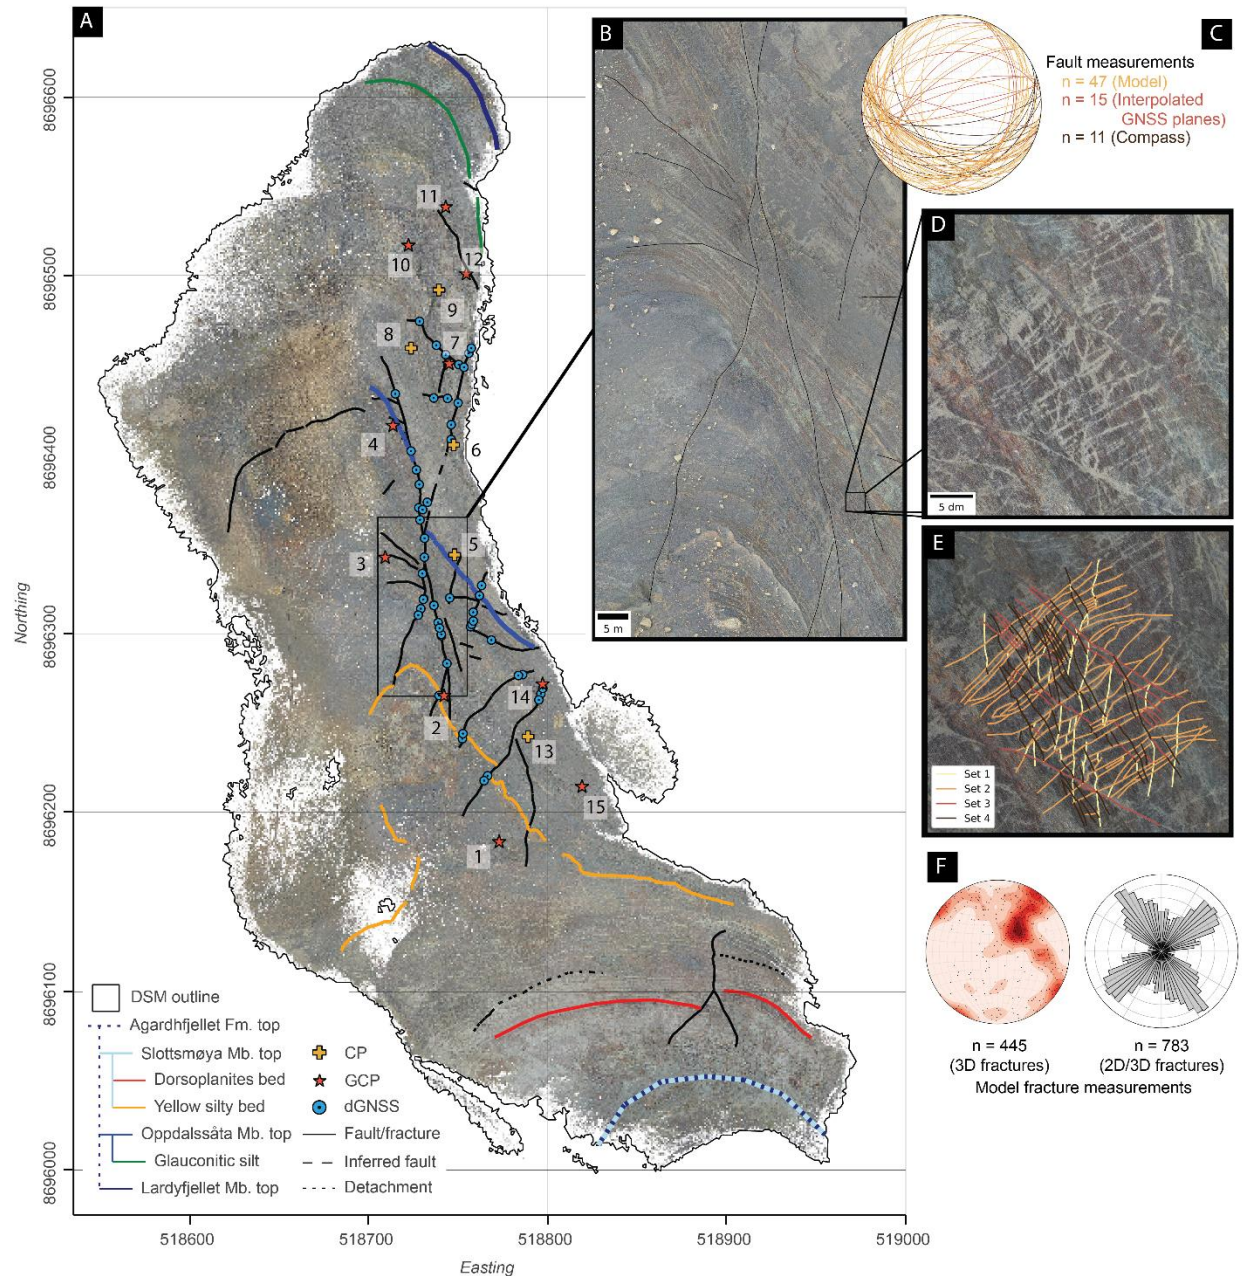

Figure 7: High resolution orthomosaics, stratigraphic units and structural measurements across the study area. A) Top-down view orthomosaic of the outcrop including control point locations and basic interpretations. Control points are subdivided into dGNSS points, ground control points, and check points. B) The 50-by-100 m zoom-in shows the lower part of the Slotsmøya member, including major structural elements. C) Stereonet of field and model structural measurements of the faults. Compass measurements are supplemented by GNSS point-plane measurements and model measurements. D) The orthomosaic is of high enough resolution to identify and delineate sub-cm scale features, as the annotated fracture sets show in E). F) Stereonet of model-picked fractures from the sub-vertical part of the outcrop and rose diagram of model-picked fracture orientations across E). Only 3D/multi-segment fractures were included in the stereonet. Maps use the WGS 84/UTM zone 33N (EPSG:32633) projection.
